# Supplementary material
Source: PubMed Central journal article supplement (PMC2952570)
Supplement: supp_M009449_jlr.M009449-1.pdf [file supp_M009449_jlr.M009449-1.pdf]

## SUPPLEMENTAL MATERIAL

**Supplemental Table 1A.** Free (non-esterified) fatty acid composition of human plasma. A total of 31 fatty acids were included in the GC/MS screen. All measurements were performed in triplicate.

| Common Name                           | Chain Length <sup>1</sup> | Mean (nmol/ml) | SEM (nmol/ml) | Mean (µg/dl) | SEM (µg/dl) |
|---------------------------------------|---------------------------|----------------|---------------|--------------|-------------|
| Lauric acid                           | 12:0                      | 0.719          | 0.029         | 14.4         | 0.6         |
| Myristic acid                         | 14:0                      | 6.06           | 0.069         | 138          | 2           |
| Pentadecanoic acid                    | 15:0                      | 0.653          | 0.004         | 15.8         | 0.1         |
| Palmitic acid                         | 16:0                      | 63.8           | 0.400         | 1634         | 10          |
| cis-9-palmitoleic acid                | 16:1                      | 14.7           | 0.169         | 372          | 4           |
| Margaric acid                         | 17:0                      | 1.20           | 0.003         | 32.3         | 0.1         |
| 10Z-heptadecenoic acid                | 17:1                      | 1.03           | 0.057         | 27.7         | 1.5         |
| Stearic acid                          | 18:0                      | 22.1           | 0.035         | 628          | 1           |
| Oleic acid                            | 18:1                      | 80.3           | 9.331         | 2267         | 263         |
| Linoleic acid                         | 18:2                      | 15.2           | 0.437         | 427          | 12          |
| α-linolenic acid                      | 18:3(ω-3)                 | 0.115          | 0.004         | 3.20         | 0.11        |
| γ-Linolenic acid                      | 18:3(ω-6)                 | 1.03           | 0.005         | 28.7         | 0.1         |
| Stearidonic acid                      | 18:4                      | 0.016          | 0.001         | 0.44         | 0.03        |
| Arachidic acid                        | 20:0                      | 0.238          | 0.002         | 7.43         | 0.06        |
| 11,14-eicosadienoic acid              | 20:2                      | 0.352          | 0.029         | 10.9         | 0.9         |
| 11,14,17-eicosatrienoic acid          | 20:3 (ω-3)                | 0.341          | 0.016         | 10.4         | 0.5         |
| Bishomo-γ-linolenic acid              | 20:3 (ω-6)                | 0.542          | 0.005         | 16.6         | 0.2         |
| 5,8,11-eicosatrienoic acid            | 20:3 (ω-9)                | 0.095          | 0.012         | 2.91         | 0.37        |
| Arachidonic acid                      | 20:4                      | 2.94           | 0.058         | 89.4         | 1.8         |
| 5,8,11,14,17-eicosapentaenoic acid    | 20:5                      | 0.435          | 0.010         | 13.1         | 0.3         |
| Behenic acid                          | 22:0                      | 0.160          | 0.007         | 5.45         | 0.24        |
| cis-erucic acid                       | 22:1                      | 0.028          | 0.002         | 0.95         | 0.07        |
| 13,16-docosadienoic acid              | 22:2                      | 0.011          | 0.001         | 0.37         | 0.03        |
| 13,16,19-docosatrienoic acid          | 22:3                      | 0.004          | 0.001         | 0.13         | 0.03        |
| 7Z,10Z,13Z,16Z-docosatetraenoic acid  | 22:4                      | 0.364          | 0.005         | 12.1         | 0.2         |
| 7,10,13,16,19-docosapentaenoic acid   | 22:5                      | 0.400          | 0.005         | 13.2         | 0.2         |
| 4, 7,10,13,16,19-docosahexaenoic acid | 22:6                      | 0.990          | 0.009         | 32.5         | 0.3         |
| Tricosanoic acid                      | 23:0                      | 0.033          | 0.004         | 1.17         | 0.14        |
| Lignoceric acid                       | 24:0                      | 0.262          | 0.014         | 9.65         | 0.52        |
| cis-selacholeic acid                  | 24:1                      | 0.070          | 0.006         | 2.56         | 0.22        |
| Cerotic acid                          | 26:0                      | 0.110          | 0.006         | 4.36         | 0.24        |

<sup>1</sup> The chain length denotes the number of carbons followed by the number of double bonds

**Supplemental Table 1B.** Eicosanoids and related metabolites in human plasma. A total of 143 metabolites were included in the LC/MS screen. All measurements were performed in triplicate.

| Metabolite <sup>1</sup>         | Mean<br>(pmol/ml) | SEM<br>(pmol/ml) | Mean<br>(ng/dl) | SEM<br>(ng/dl) |
|---------------------------------|-------------------|------------------|-----------------|----------------|
| <b>COX Biosynthetic Pathway</b> |                   |                  |                 |                |
| PGD1                            | 0.010             | 0.001            | 0.354           | 0.035          |
| 15-keto-PGF1a                   | 0.026             | 0.009            | 0.921           | 0.319          |
| PGD2                            | 0.200             | 0.065            | 7.04            | 2.29           |
| PGE2                            | 0.037             | 0.012            | 1.30            | 0.42           |
| PGF2a                           | 0.053             | 0.012            | 1.88            | 0.43           |
| PGJ2                            | 0.027             | 0.003            | 0.902           | 0.100          |
| TXB2                            | 0.037             | 0.007            | 1.37            | 0.26           |
| 15-keto-PGF2a                   | 0.209             | 0.006            | 7.36            | 0.21           |
| 13,14-dihydro-15-keto-PGD2      | 0.053             | 0.003            | 1.87            | 0.11           |
| 13,14-dihydro-15-keto-PGE2      | 0.397             | 0.062            | 14.0            | 2.2            |
| 13,14-dihydro-15-keto-PGF2a     | 0.235             | 0.028            | 8.32            | 0.99           |
| 2,3-dinor-11 $\beta$ -PGF2a     | 0.038             | 0.008            | 1.24            | 0.26           |
| 15d PGD2                        | 1.94              | 0.645            | 64.8            | 21.6           |
| 15d PGJ2                        | 0.083             | 0.003            | 2.62            | 0.10           |
| 11b-PGE2                        | 0.130             | 0.006            | 4.58            | 0.21           |
| 11b-PGF2a                       | 0.213             | 0.048            | 7.55            | 1.70           |
| bicyclo-PGE2                    | 0.039             | 0.002            | 1.30            | 0.07           |
| 11-HETE                         | 0.727             | 0.060            | 23.3            | 1.9            |
| 12-HHTrE                        | 2.03              | 0.278            | 56.9            | 7.8            |
| PGD3                            | 0.123             | 0.015            | 4.31            | 0.53           |
| 18-HEPE                         | 0.138             | 0.024            | 4.39            | 0.76           |
| TXB3                            | 0.017             | 0.003            | 0.626           | 0.110          |
| <b>LOX Biosynthetic Pathway</b> |                   |                  |                 |                |
| 9-HODE                          | 6.8               | 1.67             | 201             | 50             |
| 13-HODE                         | 10.6              | 1.28             | 314             | 38             |
| 13-OxoODE                       | 0.490             | 0.040            | 14.4            | 1.2            |
| 9-HOTrE                         | 0.503             | 0.052            | 14.8            | 1.5            |
| 13-HOTrE                        | 0.493             | 0.017            | 14.5            | 0.5            |
| 13-HOTrE(y)                     | 0.503             | 0.044            | 14.8            | 1.3            |
| 5-HETrE                         | 0.253             | 0.018            | 8.15            | 0.58           |
| 8-HETrE                         | 0.123             | 0.003            | 3.96            | 0.10           |
| 15-HETrE                        | 0.421             | 0.015            | 13.6            | 0.5            |
| 5-HETE                          | 11.9              | 1.40             | 381             | 45             |
| 6-trans-LTB4                    | 0.110             | 0.030            | 3.70            | 1.01           |
| 12-epi-LTB4                     | 0.220             | 0.070            | 7.40            | 2.35           |
| 6-trans-12-epi-LTB4             | 0.097             | 0.037            | 3.26            | 1.24           |
| LTB4                            | 0.037             | 0.007            | 1.24            | 0.24           |
| LTC4                            | 0.047             | 0.023            | 2.94            | 1.44           |
| 11-trans-LTC4                   | 0.009             | 0.002            | 0.56            | 0.13           |
| LTE4                            | 0.020             | 0.010            | 0.88            | 0.44           |
| 8-HETE                          | 0.749             | 0.033            | 24.0            | 1.1            |
| 12-HETE                         | 4.22              | 0.292            | 135             | 9              |
| Tetranor 12-HETE                | 0.310             | 0.031            | 8.25            | 0.83           |
| 15-HETE                         | 0.800             | 0.023            | 25.6            | 0.7            |
| 15-oxoETE                       | 0.069             | 0.033            | 2.20            | 1.05           |
| 5,15-DiHETE                     | 0.527             | 0.017            | 17.70           | 0.60           |

|                                 |       |       |      |      |
|---------------------------------|-------|-------|------|------|
| 5S,6S-Lipoxin A4                | 0.053 | 0.013 | 1.87 | 0.46 |
| 5-HEPE                          | 0.67  | 0.121 | 21.3 | 3.9  |
| 12-HEPE                         | 0.517 | 0.084 | 16.5 | 2.7  |
| 15-HEPE                         | 0.197 | 0.019 | 6.27 | 0.61 |
| <b>CYP Biosynthetic Pathway</b> |       |       |      |      |
| 12,13-DiHOME                    | 5.02  | 0.19  | 158  | 6    |
| 5,6-EpETrE                      | 0.110 | 0.021 | 3.52 | 0.67 |
| 14,15-EpETrE                    | 1.750 | 0.043 | 56.0 | 1.4  |
| 5,6-DiHETrE                     | 0.610 | 0.057 | 20.6 | 1.9  |
| 8,9-DiHETrE                     | 0.510 | 0.066 | 17.3 | 2.2  |
| 11,12-DiHETrE                   | 0.513 | 0.094 | 17.4 | 3.2  |
| 14,15-DiHETrE                   | 1.449 | 0.071 | 49.0 | 2.4  |
| 16-HETE                         | 0.277 | 0.086 | 8.87 | 2.75 |
| 17-HETE                         | 0.113 | 0.021 | 3.62 | 0.67 |
| 18-HETE                         | 0.273 | 0.047 | 8.74 | 1.51 |
| 20-HETE                         | 0.83  | 0.150 | 26.6 | 4.8  |
| 16(17)-EpDPE                    | 0.239 | 0.048 | 8.23 | 1.65 |
| 19,20-DiHDPA                    | 1.23  | 0.389 | 44.6 | 14.1 |
| <b>Non-Enzymatic Pathway</b>    |       |       |      |      |
| 5-iPF2a-VI                      | 0.381 | 0.015 | 13.5 | 0.5  |
| 8-iso-PGF2a                     | 0.151 | 0.018 | 5.35 | 0.64 |
| 9-HETE                          | 1.704 | 0.081 | 54.6 | 2.6  |
| 9-HEPE                          | 0.066 | 0.014 | 2.10 | 0.45 |
| 4-HDoHE                         | 5.3   | 1.31  | 182  | 45   |
| 7-HDoHE                         | 0.131 | 0.022 | 4.51 | 0.76 |
| 8-HDoHE                         | 0.294 | 0.076 | 10.1 | 2.6  |
| 10-HDoHE                        | 0.075 | 0.025 | 2.58 | 0.86 |
| 11-HDoHE                        | 0.175 | 0.005 | 6.02 | 0.17 |
| 13-HDoHE                        | 0.172 | 0.040 | 5.92 | 1.38 |
| 14-HDoHE                        | 1.64  | 0.128 | 56.5 | 4.4  |
| 16-HDoHE                        | 0.202 | 0.041 | 6.95 | 1.41 |
| 17-HDoHE                        | 0.194 | 0.007 | 6.68 | 0.24 |
| 20-HDoHE                        | 0.228 | 0.015 | 7.85 | 0.52 |

<sup>1</sup> For abbreviations see <http://www.lipidmaps.org>

**Supplemental Table 2A:** Triacylglyceride isobaric molecular subsets in human plasma. All measurements were performed in triplicate.

| <b>Triacylglycerol<sup>1</sup></b> | <b>Mean<br/>(nmol/ml)</b> | <b>SEM<br/>(nmol/ml)</b> | <b>Mean<br/>(mg/dl)</b> | <b>SEM<br/>(mg/dl)</b> |
|------------------------------------|---------------------------|--------------------------|-------------------------|------------------------|
| TG(48:1)                           | 27.0                      | 2.9                      | 2.17                    | 0.23                   |
| TG(48:2)                           | 20.2                      | 4.1                      | 1.62                    | 0.33                   |
| TG(50:0)                           | 11.6                      | 2.8                      | 0.97                    | 0.23                   |
| TG(50:1)                           | 63.6                      | 1.8                      | 5.30                    | 0.15                   |
| TG(50:2)                           | 79.8                      | 8.9                      | 6.63                    | 0.74                   |
| TG(50:3)                           | 57.1                      | 5.5                      | 4.73                    | 0.46                   |
| TG(50:4)                           | 18.9                      | 3.2                      | 1.56                    | 0.26                   |
| TG(52:1)                           | 29.6                      | 1.9                      | 2.55                    | 0.16                   |
| TG(52:2)                           | 139.5                     | 10.0                     | 12.0                    | 0.9                    |
| TG(52:3)                           | 214.8                     | 22.0                     | 18.4                    | 1.9                    |
| TG(52:4)                           | 90.9                      | 9.6                      | 7.77                    | 0.82                   |
| TG(52:5)                           | 32.0                      | 1.4                      | 2.73                    | 0.12                   |
| TG(54:2)                           | 21.5                      | 4.3                      | 1.91                    | 0.38                   |
| TG(54:3)                           | 69.1                      | 9.5                      | 6.11                    | 0.84                   |
| TG(54:4)                           | 68.5                      | 10.3                     | 6.05                    | 0.91                   |
| TG(54:5)                           | 53.6                      | 6.0                      | 4.72                    | 0.53                   |
| TG(54:6)                           | 36.5                      | 2.6                      | 3.21                    | 0.23                   |
| TG(56:6)                           | 23.5                      | 2.6                      | 2.13                    | 0.24                   |

<sup>1</sup> TG(total acyl carbons:total double bonds).

**Supplemental Table 2B:** 1,2-Diacylglyceride isobaric molecular species in human plasma. All measurements were performed in triplicate.

| <b>1,2-Diacylglycerol<sup>1</sup></b> | <b>Mean<br/>(nmol/ml)</b> | <b>SEM<br/>(nmol/ml)</b> | <b>Mean<br/>(<math>\mu</math>g/dl)</b> | <b>SEM<br/>(<math>\mu</math>g/dl)</b> |
|---------------------------------------|---------------------------|--------------------------|----------------------------------------|---------------------------------------|
| 1,2-DG( 30:0)                         | 0.58                      | 0.21                     | 31.3                                   | 11.3                                  |
| 1,2-DG( 30:1)                         | 0.231                     | 0.054                    | 12.4                                   | 2.9                                   |
| 1,2-DG( 30:2)                         | 0.032                     | 0.009                    | 1.72                                   | 0.48                                  |
| 1,2-DG( 32:0)                         | 1.42                      | 0.42                     | 80.7                                   | 23.9                                  |
| 1,2-DG( 32:1)                         | 1.07                      | 0.14                     | 60.6                                   | 7.9                                   |
| 1,2-DG( 32:2)                         | 0.415                     | 0.069                    | 23.4                                   | 3.9                                   |
| 1,2-DG( 32:3)                         | 0.060                     | 0.024                    | 3.37                                   | 1.35                                  |
| 1,2-DG( 34:0)                         | 1.37                      | 0.53                     | 81.7                                   | 31.6                                  |
| 1,2-DG( 34:1)                         | 3.87                      | 0.62                     | 230                                    | 37                                    |
| 1,2-DG( 34:2)                         | 2.82                      | 0.36                     | 167                                    | 21                                    |
| 1,2-DG( 34:3)                         | 1.65                      | 0.17                     | 97.4                                   | 10.0                                  |
| 1,2-DG( 34:4)                         | 0.173                     | 0.081                    | 10.2                                   | 4.8                                   |
| 1,2-DG( 36:0)                         | 0.69                      | 0.19                     | 43.1                                   | 11.9                                  |
| 1,2-DG( 36:1)                         | 1.24                      | 0.33                     | 77.2                                   | 20.5                                  |
| 1,2-DG( 36:2)                         | 4.06                      | 0.54                     | 252                                    | 34                                    |
| 1,2-DG( 36:3)                         | 8.1                       | 1.0                      | 501                                    | 62                                    |
| 1,2-DG( 36:4)                         | 5.28                      | 0.65                     | 326                                    | 40                                    |
| 1,2-DG( 36:5)                         | 0.961                     | 0.023                    | 59.1                                   | 1.4                                   |
| 1,2-DG( 38:0)                         | 0.003                     | 0.000                    | 0.20                                   | 0.00                                  |
| 1,2-DG( 38:1)                         | 0.013                     | 0.005                    | 0.85                                   | 0.33                                  |
| 1,2-DG( 38:2)                         | 0.022                     | 0.010                    | 1.43                                   | 0.65                                  |
| 1,2-DG( 38:3)                         | 0.28                      | 0.02                     | 18.1                                   | 1.3                                   |
| 1,2-DG( 38:4)                         | 0.94                      | 0.11                     | 60.6                                   | 7.1                                   |
| 1,2-DG( 38:5)                         | 1.61                      | 0.20                     | 103.0                                  | 13.0                                  |
| 1,2-DG( 38:6)                         | 1.137                     | 0.073                    | 72.8                                   | 4.7                                   |
| 1,2-DG( 40:4)                         | 0.036                     | 0.004                    | 2.42                                   | 0.27                                  |
| 1,2-DG( 40:6)                         | 0.254                     | 0.032                    | 17.0                                   | 2.1                                   |
| 1,2-DG( 40:7)                         | 0.310                     | 0.068                    | 20.7                                   | 4.5                                   |

<sup>1</sup> 1,2-DG(total acyl carbons:total double bonds).

**Supplemental Table 2C:** 1,3-Diacylglyceride isobaric molecular species in human plasma. All measurements were performed in triplicate.

| <b>1,3-Diacylglycerol<sup>1</sup></b> | <b>Mean<br/>(nmol/ml)</b> | <b>SEM<br/>(nmol/ml)</b> | <b>Mean<br/>(µg/dl)</b> | <b>SEM<br/>(µg/dl)</b> |
|---------------------------------------|---------------------------|--------------------------|-------------------------|------------------------|
| 1,3-DG( 30:0)                         | 0.243                     | 0.012                    | 13.1                    | 0.6                    |
| 1,3-DG( 30:1)                         | 0.105                     | 0.018                    | 5.65                    | 0.97                   |
| 1,3-DG( 30:2)                         | 0.013                     | 0.003                    | 0.70                    | 0.16                   |
| 1,3-DG( 32:0)                         | 0.677                     | 0.027                    | 38.5                    | 1.5                    |
| 1,3-DG( 32:1)                         | 0.411                     | 0.037                    | 23.3                    | 2.1                    |
| 1,3-DG( 32:2)                         | 0.161                     | 0.021                    | 9.09                    | 1.19                   |
| 1,3-DG( 32:3)                         | 0.017                     | 0.004                    | 0.96                    | 0.23                   |
| 1,3-DG( 34:0)                         | 1.04                      | 0.11                     | 62.2                    | 6.5                    |
| 1,3-DG( 34:1)                         | 1.48                      | 0.10                     | 88.0                    | 5.8                    |
| 1,3-DG( 34:2)                         | 1.16                      | 0.11                     | 69.0                    | 6.5                    |
| 1,3-DG( 34:3)                         | 0.571                     | 0.045                    | 33.7                    | 2.7                    |
| 1,3-DG( 34:4)                         | 0.046                     | 0.010                    | 2.71                    | 0.59                   |
| 1,3-DG( 36:0)                         | 0.769                     | 0.064                    | 48.0                    | 4.0                    |
| 1,3-DG( 36:1)                         | 0.361                     | 0.056                    | 22.5                    | 3.5                    |
| 1,3-DG( 36:2)                         | 1.36                      | 0.15                     | 84.6                    | 9.6                    |
| 1,3-DG( 36:3)                         | 1.84                      | 0.18                     | 114                     | 11                     |
| 1,3-DG( 36:4)                         | 1.42                      | 0.14                     | 87.5                    | 8.4                    |
| 1,3-DG( 36:5)                         | 0.312                     | 0.031                    | 19.2                    | 1.9                    |
| 1,3-DG( 38:0)                         | 0.040                     | 0.021                    | 2.61                    | 1.37                   |
| 1,3-DG( 38:2)                         | 0.002                     | 0.000                    | 0.13                    | 0.00                   |
| 1,3-DG( 38:3)                         | 0.007                     | 0.000                    | 0.45                    | 0.00                   |
| 1,3-DG( 38:4)                         | 0.036                     | 0.016                    | 2.32                    | 1.03                   |
| 1,3-DG( 38:5)                         | 0.253                     | 0.025                    | 16.3                    | 1.6                    |
| 1,3-DG( 38:6)                         | 0.399                     | 0.061                    | 25.6                    | 3.9                    |
| 1,3-DG( 40:4)                         | 0.360                     | 0.033                    | 24.2                    | 2.2                    |
| 1,3-DG( 40:6)                         | 0.044                     | 0.017                    | 2.94                    | 1.14                   |
| 1,3-DG( 40:7)                         | 0.118                     | 0.017                    | 7.86                    | 1.13                   |

<sup>1</sup> 1,3-DG(total acyl carbons:total double bonds).

**Supplemental Table 3A:** Glycerophospholipids in human plasma samples. The measurements for LPE, LPC, PS, PG, and PA species were performed in quadruplicate; the measurements for PE, PC, and PI species were performed in quintuplicate.

| Phospholipid                     | Mean (nmol/ml) | SEM (nmol/ml) | Mean (mg/dl) | SEM (mg/dl) |
|----------------------------------|----------------|---------------|--------------|-------------|
| PE(32:1)                         | 0.904          | 0.065         | 0.062        | 0.004       |
| PE(34:0)                         | 0.801          | 0.128         | 0.058        | 0.009       |
| PE(34:1)                         | 5.95           | 0.18          | 0.427        | 0.013       |
| PE(34:1p) <sup>1</sup>           | 3.93           | 0.13          | 0.276        | 0.009       |
| PE(34:2)                         | 12.0           | 0.8           | 0.857        | 0.057       |
| PE(34:2p) <sup>1</sup>           | 7.32           | 0.23          | 0.512        | 0.016       |
| PE(36:0)                         | 14.1           | 0.6           | 1.05         | 0.04        |
| PE(36:1)                         | 8.21           | 0.37          | 0.612        | 0.028       |
| PE(36:2)                         | 29.5           | 0.9           | 2.19         | 0.07        |
| PE(36:2e)/PE(36:1p) <sup>1</sup> | 5.46           | 0.18          | 0.398        | 0.013       |
| PE(36:3)                         | 16.0           | 0.5           | 1.18         | 0.04        |
| PE(36:3e)/PE(36:2p) <sup>1</sup> | 13.7           | 0.5           | 0.995        | 0.036       |
| PE(36:4)                         | 22.9           | 0.5           | 1.69         | 0.04        |
| PE(36:4e)/PE(36:3p) <sup>1</sup> | 11.7           | 0.3           | 0.851        | 0.022       |
| PE(36:5)                         | 4.10           | 0.20          | 0.302        | 0.015       |
| PE(36:5e)/PE(36:4p) <sup>1</sup> | 19.6           | 0.9           | 1.42         | 0.07        |
| PE(38:1)                         | 10.3           | 0.3           | 0.800        | 0.023       |
| PE(38:2)                         | 0.763          | 0.142         | 0.059        | 0.011       |
| PE(38:3)                         | 6.83           | 0.73          | 0.525        | 0.056       |
| PE(38:4)                         | 48.1           | 2.0           | 3.69         | 0.15        |
| PE(38:5)                         | 20.9           | 0.8           | 1.60         | 0.06        |
| PE(38:5e)/PE(38:4p) <sup>1</sup> | 54.6           | 0.3           | 4.10         | 0.02        |
| PE(38:6)                         | 19.5           | 0.7           | 1.49         | 0.05        |
| PE(38:6e)/PE(38:5p) <sup>1</sup> | 32.7           | 0.6           | 2.45         | 0.04        |
| PE(40:1)                         | 1.73           | 0.40          | 0.138        | 0.032       |
| PE(40:4)                         | 2.34           | 0.06          | 0.186        | 0.005       |
| PE(40:5)                         | 4.84           | 0.44          | 0.384        | 0.035       |
| PE(40:5e) <sup>1</sup>           | 7.7            | 0.25          | 0.600        | 0.019       |
| PE(40:6)                         | 10.0           | 0.5           | 0.792        | 0.040       |
| PE(40:6e) <sup>1</sup>           | 11.5           | 0.3           | 0.897        | 0.023       |
| PE(40:7)                         | 2.57           | 0.18          | 0.203        | 0.014       |
| PE(40:7e) <sup>1</sup>           | 15.9           | 0.4           | 1.23         | 0.03        |
| PE(42:1)                         | 0.862          | 0.120         | 0.071        | 0.010       |
| PE(42:5)                         | 1.47           | 0.36          | 0.121        | 0.030       |
| PE(42:5p) <sup>1</sup>           | 1.83           | 0.18          | 0.148        | 0.014       |
| PE(42:6)                         | 1.64           | 0.34          | 0.134        | 0.028       |
| PE(42:6p) <sup>1</sup>           | 1.70           | 0.22          | 0.136        | 0.018       |
| PE(42:7)                         | 1.20           | 0.21          | 0.098        | 0.017       |
| LPE(16:0)                        | 3.45           | 0.42          | 0.156        | 0.019       |
| LPE(18:0)                        | 7.41           | 0.76          | 0.356        | 0.037       |
| LPE(18:1)                        | 6.44           | 0.71          | 0.308        | 0.034       |
| LPE(18:2)                        | 7.85           | 1.06          | 0.374        | 0.051       |
| LPE(20:4)                        | 7.32           | 0.75          | 0.367        | 0.038       |
| LPE(22:1)                        | 0.311          | 0.099         | 0.017        | 0.005       |
| LPE(22:6)                        | 3.86           | 0.44          | 0.203        | 0.023       |

|                                  |       |       |       |       |
|----------------------------------|-------|-------|-------|-------|
| PC(30:1)                         | 1.12  | 0.11  | 0.078 | 0.008 |
| PC(32:0)                         | 11.4  | 0.6   | 0.839 | 0.043 |
| PC(32:1)                         | 28.6  | 1.8   | 2.09  | 0.13  |
| PC(32:2)                         | 9.80  | 0.45  | 0.714 | 0.032 |
| PC(34:0)                         | 7.66  | 2.05  | 0.583 | 0.153 |
| PC(34:1)                         | 89.3  | 8.1   | 6.78  | 0.60  |
| PC(34:1e) <sup>1</sup>           | 2.80  | 0.13  | 0.209 | 0.01  |
| PC(34:2)                         | 188   | 14    | 14.2  | 1.0   |
| PC(34:2e) <sup>1</sup>           | 3.99  | 0.21  | 0.296 | 0.015 |
| PC(34:3)                         | 13.8  | 1.0   | 1.04  | 0.07  |
| PC(36:0)                         | 7.95  | 1.51  | 0.627 | 0.117 |
| PC(36:1)                         | 99.8  | 13.0  | 7.85  | 1.00  |
| PC(36:1e)/PC(36:0p) <sup>1</sup> | 2.57  | 0.55  | 0.199 | 0.042 |
| PC(36:2)                         | 254   | 18    | 19.9  | 1.39  |
| PC(36:2e)/PC(36:1p) <sup>1</sup> | 6.25  | 0.55  | 0.482 | 0.042 |
| PC(36:3)                         | 165   | 13    | 12.9  | 1.0   |
| PC(36:4)                         | 172   | 11    | 13.4  | 0.8   |
| PC(36:4e)/PC(36:3p) <sup>1</sup> | 29.0  | 1.5   | 2.23  | 0.11  |
| PC(36:5)                         | 12.8  | 1.2   | 0.997 | 0.092 |
| PC(38:2)                         | 37.6  | 5.7   | 3.06  | 0.46  |
| PC(38:3e)/PC(38:2p) <sup>1</sup> | 11.6  | 0.9   | 0.921 | 0.07  |
| PC(38:4)                         | 254   | 21    | 20.6  | 1.67  |
| PC(38:5)                         | 86.3  | 9.0   | 6.97  | 0.71  |
| PC(38:5e)/PC(38:4p) <sup>1</sup> | 49.9  | 2.8   | 3.96  | 0.22  |
| PC(38:6)                         | 62.9  | 4.9   | 5.07  | 0.39  |
| PC(40:2)                         | 133   | 16    | 11.2  | 1.3   |
| PC(40:4)                         | 36.7  | 5.5   | 3.08  | 0.45  |
| PC(40:5)                         | 66.6  | 10.1  | 5.56  | 0.83  |
| PC(40:6)                         | 79.4  | 10.3  | 6.61  | 0.84  |
| PC(40:7)                         | 23.1  | 4.5   | 1.92  | 0.37  |
| PC(40:8)                         | 27.0  | 2.5   | 2.24  | 0.20  |
| LPC(16:0)                        | 29.8  | 4.9   | 1.48  | 0.23  |
| LPC(16:0e) <sup>1</sup>          | 0.491 | 0.089 | 0.023 | 0.004 |
| LPC(16:0p) <sup>1</sup>          | 1.73  | 0.26  | 0.080 | 0.012 |
| LPC(16:1)                        | 3.77  | 0.68  | 0.181 | 0.033 |
| LPC(18:0)                        | 23.3  | 3.5   | 1.22  | 0.18  |
| LPC(18:0e) <sup>1</sup>          | 0.911 | 0.149 | 0.045 | 0.007 |
| LPC(18:1)                        | 14.8  | 2.3   | 0.751 | 0.114 |
| LPC(18:2)                        | 16.9  | 2.2   | 0.851 | 0.113 |
| LPC(20:3)                        | 3.26  | 0.43  | 0.173 | 0.023 |
| LPC(20:4)                        | 5.73  | 0.73  | 0.303 | 0.039 |
| LPC(22:5)                        | 1.00  | 0.11  | 0.056 | 0.006 |
| LPC(22:6)                        | 1.57  | 0.18  | 0.087 | 0.010 |
| PS(32:1)                         | 0.239 | 0.017 | 0.018 | 0.001 |
| PS(34:0)                         | 0.307 | 0.062 | 0.023 | 0.005 |
| PS(34:1)                         | 0.186 | 0.029 | 0.014 | 0.002 |
| PS(34:2)                         | 0.151 | 0.021 | 0.011 | 0.002 |
| PS(36:0)                         | 2.090 | 0.190 | 0.165 | 0.015 |
| PS(36:1)                         | 0.733 | 0.149 | 0.058 | 0.012 |
| PS(36:2)                         | 0.316 | 0.065 | 0.025 | 0.005 |
| PS(36:3)                         | 0.123 | 0.020 | 0.010 | 0.002 |



|          |       |       |       |       |
|----------|-------|-------|-------|-------|
| PS(36:4) | 0.179 | 0.031 | 0.014 | 0.002 |
| PS(38:1) | 0.264 | 0.075 | 0.022 | 0.006 |
| PS(38:2) | 0.188 | 0.023 | 0.015 | 0.002 |
| PS(38:3) | 0.194 | 0.043 | 0.016 | 0.003 |
| PS(38:4) | 0.481 | 0.083 | 0.039 | 0.007 |
| PS(38:5) | 0.281 | 0.054 | 0.023 | 0.004 |
| PS(38:6) | 0.162 | 0.017 | 0.013 | 0.001 |
| PS(40:3) | 0.090 | 0.015 | 0.008 | 0.001 |
| PS(40:4) | 0.101 | 0.029 | 0.008 | 0.002 |
| PS(40:5) | 0.114 | 0.045 | 0.010 | 0.004 |
| PS(40:6) | 0.637 | 0.109 | 0.053 | 0.009 |
| PS(40:7) | 0.169 | 0.028 | 0.014 | 0.002 |
| PG(34:1) | 0.604 | 0.044 | 0.045 | 0.003 |
| PG(34:2) | 0.080 | 0.010 | 0.006 | 0.001 |
| PG(36:1) | 1.59  | 0.12  | 0.123 | 0.009 |
| PG(36:2) | 0.194 | 0.010 | 0.015 | 0.001 |
| PG(36:3) | 0.338 | 0.052 | 0.026 | 0.004 |
| PG(36:4) | 0.217 | 0.036 | 0.017 | 0.003 |
| PG(36:5) | 0.351 | 0.025 | 0.027 | 0.002 |
| PG(38:4) | 0.191 | 0.026 | 0.015 | 0.002 |
| PG(38:5) | 0.605 | 0.127 | 0.048 | 0.010 |
| PG(38:6) | 0.919 | 0.137 | 0.073 | 0.011 |
| PG(40:4) | 0.323 | 0.019 | 0.027 | 0.002 |
| PG(40:5) | 0.159 | 0.029 | 0.013 | 0.002 |
| PG(40:6) | 0.145 | 0.021 | 0.012 | 0.002 |
| PG(40:7) | 0.181 | 0.024 | 0.015 | 0.002 |
| PG(40:8) | 0.105 | 0.018 | 0.009 | 0.001 |
| PG(40:9) | 0.116 | 0.019 | 0.009 | 0.002 |
| PA(32:0) | 0.186 | 0.037 | 0.012 | 0.002 |
| PA(32:1) | 0.199 | 0.048 | 0.013 | 0.003 |
| PA(34:0) | 0.225 | 0.021 | 0.015 | 0.001 |
| PA(34:1) | 0.147 | 0.012 | 0.010 | 0.001 |
| PA(34:2) | 0.144 | 0.015 | 0.010 | 0.001 |
| PA(36:0) | 0.231 | 0.032 | 0.016 | 0.002 |
| PA(36:1) | 0.118 | 0.012 | 0.008 | 0.001 |
| PA(36:2) | 0.223 | 0.047 | 0.016 | 0.003 |
| PA(36:3) | 0.117 | 0.017 | 0.008 | 0.001 |
| PA(36:4) | 0.208 | 0.042 | 0.014 | 0.003 |
| PA(38:2) | 0.138 | 0.029 | 0.010 | 0.002 |
| PA(38:3) | 0.121 | 0.011 | 0.009 | 0.001 |
| PA(38:4) | 0.164 | 0.018 | 0.012 | 0.001 |
| PA(38:5) | 0.212 | 0.043 | 0.015 | 0.003 |
| PA(38:6) | 0.070 | 0.010 | 0.005 | 0.001 |
| PI(32:1) | 0.746 | 0.165 | 0.060 | 0.013 |
| PI(34:0) | 0.473 | 0.101 | 0.040 | 0.008 |
| PI(34:1) | 1.78  | 0.14  | 0.149 | 0.012 |
| PI(34:2) | 2.64  | 1.30  | 0.220 | 0.108 |
| PI(36:0) | 0.269 | 0.015 | 0.023 | 0.001 |
| PI(36:1) | 1.77  | 0.14  | 0.153 | 0.012 |
| PI(36:2) | 4.29  | 0.39  | 0.370 | 0.034 |

|          |       |       |       |       |
|----------|-------|-------|-------|-------|
| PI(36:3) | 1.17  | 0.06  | 0.101 | 0.005 |
| PI(36:4) | 1.27  | 0.08  | 0.109 | 0.007 |
| PI(36:5) | 0.570 | 0.065 | 0.049 | 0.006 |
| PI(38:2) | 0.189 | 0.059 | 0.017 | 0.005 |
| PI(38:3) | 1.830 | 0.140 | 0.163 | 0.012 |
| PI(38:4) | 11.0  | 0.7   | 0.975 | 0.061 |
| PI(38:5) | 1.28  | 0.14  | 0.113 | 0.012 |
| PI(38:6) | 0.498 | 0.130 | 0.044 | 0.011 |
| PI(40:3) | 0.217 | 0.019 | 0.020 | 0.002 |
| PI(40:4) | 0.451 | 0.030 | 0.041 | 0.003 |
| PI(40:5) | 0.475 | 0.046 | 0.043 | 0.004 |
| PI(40:6) | 0.540 | 0.053 | 0.049 | 0.005 |

<sup>1</sup> Ether-linked isobaric species of plasmanylin (e) and plasmeylin (p) analogues of glycerophospholipids. When chromatographic separation was not achieved, both analogues are listed.

**Supplemental Table 3B:** Concentration and composition of *N*-acyl-PS in human plasma after acidic Folch extraction. All measurements were performed in triplicate.

| <b>N-acyl-PS</b> | <b>Mean<br/>(pmol/ml)</b> | <b>SEM<br/>(pmol/ml)</b> | <b>Mean<br/>(µg/dl)</b> | <b>SEM<br/>(µg/dl)</b> |
|------------------|---------------------------|--------------------------|-------------------------|------------------------|
| 52:1             | 9.60                      | 1.20                     | 0.987                   | 0.123                  |
| 54:2             | 2.54                      | 0.41                     | 0.268                   | 0.043                  |

**Supplemental Table 4A:** Sphingomyelins in human plasma samples. All measurements were performed in quadruplicate.

| SM    | Mean (nmol/ml) | SEM (nmol/ml) | Mean (µg/dl) | SEM (µg/dl) | Sphingoid base <sup>1</sup>                        | Fatty acid <sup>2</sup>                            | % <sup>2</sup>               |
|-------|----------------|---------------|--------------|-------------|----------------------------------------------------|----------------------------------------------------|------------------------------|
| C31:0 | 0.303          | 0.004         | 20.0         | 0.3         |                                                    |                                                    |                              |
| C32:2 | 0.544          | 0.016         | 36.6         | 1.1         | d18:0                                              | C13:0                                              | 100                          |
| C32:1 | 9.17           | 0.18          | 620          | 12          | d18:2                                              | C14:0                                              | 100                          |
| C32:0 | 1.00           | 0.01          | 68.1         | 0.7         | d18:1<br>d16:1                                     | C14:0<br>C16:0                                     | 66<br>34                     |
| C33:2 | 0.201          | 0.005         | 13.8         | 0.4         | d18:0                                              | C14:0                                              | 100                          |
| C33:1 | 6.22           | 0.12          | 429          | 8           | d18:2<br>d17:2                                     | C15:0<br>C16:0                                     | 16<br>84                     |
| C33:0 | 0.590          | 0.008         | 40.8         | 0.5         | d18:1<br>d16:1                                     | C15:0<br>C17:0                                     | 12<br>88                     |
| C34:2 | 0.702          | 0.021         | 49.3         | 1.5         | d18:0                                              | C15:0                                              | 100                          |
| C34:1 | 81.0           | 0.9           | 5700         | 66          | d18:2<br>d18:1<br>d16:1                            | C16:0<br>C16:1<br>C18:1                            | 85<br>7<br>7                 |
| C34:0 | 16.7           | 0.2           | 1180         | 17          | d18:1<br>d16:1                                     | C16:0<br>C18:0                                     | 96<br>4                      |
| C35:1 | 3.75           | 0.36          | 269          | 26          | d18:0                                              | C16:0                                              | 100                          |
| C35:0 | 1.24           | 0.33          | 88.9         | 23.5        | d18:1<br>d17:1<br>d19:1                            | C17:0<br>C18:0<br>C16:0                            | 36<br>34<br>30               |
| C36:3 | 1.05           | 0.07          | 76.5         | 4.9         | d18:0                                              | C17:0                                              | 100                          |
| C36:2 | 10.8           | 0.2           | 791          | 13          | d18:2                                              | C18:1                                              | 100                          |
| C36:1 | 16.2           | 0.4           | 1180         | 26          | d18:2<br>d18:1<br>d18:0<br>d16:1<br>d19:1<br>d20:2 | C18:0<br>C18:1<br>C18:2<br>C20:1<br>C17:1<br>C16:0 | 52<br>31<br>4<br>4<br>7<br>2 |
| C36:0 | 4.11           | 0.08          | 301          | 6           | d18:1<br>d16:1                                     | C18:0<br>C20:0                                     | 81<br>19                     |
|       |                |               |              |             | d18:0<br>d16:0<br>d19:0                            | C18:0<br>C20:0<br>C17:0                            | 63<br>9<br>29                |

|       |       |       |      |     |       |       |     |
|-------|-------|-------|------|-----|-------|-------|-----|
| C37:1 | 0.902 | 0.055 | 67.3 | 4.1 |       |       |     |
|       |       |       |      |     | d18:1 | C19:0 | 64  |
|       |       |       |      |     | d19:1 | C18:0 | 36  |
| C38:3 | 0.511 | 0.044 | 38.6 | 3.3 |       |       |     |
|       |       |       |      |     | d18:2 | C20:1 | 44  |
|       |       |       |      |     | d18:1 | C20:2 | 28  |
|       |       |       |      |     | d16:1 | C22:2 | 28  |
| C38:2 | 6.60  | 0.24  | 500  | 18  |       |       |     |
|       |       |       |      |     | d18:2 | C20:0 | 75  |
|       |       |       |      |     | d18:1 | C20:1 | 12  |
|       |       |       |      |     | d17:2 | C21:0 | 6   |
|       |       |       |      |     | d16:1 | C22:1 | 7   |
| C38:1 | 9.98  | 0.24  | 758  | 18  |       |       |     |
|       |       |       |      |     | d18:1 | C20:0 | 49  |
|       |       |       |      |     | d16:1 | C22:0 | 51  |
| C38:0 | 2.78  | 0.03  | 212  | 2   |       |       |     |
|       |       |       |      |     | d18:0 | C20:0 | 60  |
|       |       |       |      |     | d16:0 | C22:0 | 40  |
| C39:2 | 0.894 | 0.044 | 69.0 | 3.4 |       |       |     |
|       |       |       |      |     | d18:2 | C21:0 | 50  |
|       |       |       |      |     | d16:2 | C23:0 | 50  |
| C39:1 | 4.34  | 0.13  | 336  | 10  |       |       |     |
|       |       |       |      |     | d18:1 | C21:0 | 18  |
|       |       |       |      |     | d17:1 | C22:0 | 35  |
|       |       |       |      |     | d16:1 | C23:0 | 28  |
|       |       |       |      |     | d19:1 | C20:0 | 11  |
|       |       |       |      |     | d20:1 | C19:0 | 9   |
| C40:3 | 1.47  | 0.10  | 115  | 8   |       |       |     |
|       |       |       |      |     | d18:2 | C22:1 | 46  |
|       |       |       |      |     | d18:1 | C22:2 | 39  |
|       |       |       |      |     | d16:1 | C24:2 | 15  |
| C40:2 | 15.7  | 0.6   | 1240 | 44  |       |       |     |
|       |       |       |      |     | d18:2 | C22:0 | 59  |
|       |       |       |      |     | d18:1 | C22:1 | 16  |
|       |       |       |      |     | d16:1 | C24:1 | 25  |
| C40:1 | 15.0  | 0.4   | 1180 | 31  |       |       |     |
|       |       |       |      |     | d18:1 | C22:0 | 86  |
|       |       |       |      |     | d16:1 | C24:0 | 14  |
| C40:0 | 3.32  | 0.10  | 262  | 8   |       |       |     |
|       |       |       |      |     | d18:0 | C22:0 | 100 |
| C41:3 | 0.672 | 0.011 | 53.6 | 0.9 |       |       |     |
|       |       |       |      |     | d18:2 | C23:1 | 100 |
| C41:2 | 5.85  | 0.15  | 468  | 12  |       |       |     |
|       |       |       |      |     | d18:2 | C23:0 | 55  |
|       |       |       |      |     | d18:1 | C23:1 | 11  |
|       |       |       |      |     | d17:1 | C24:1 | 31  |
|       |       |       |      |     | d20:1 | C21:1 | 2   |
| C41:1 | 7.00  | 0.27  | 562  | 22  |       |       |     |
|       |       |       |      |     | d18:1 | C23:0 | 84  |
|       |       |       |      |     | d17:1 | C24:0 | 11  |
|       |       |       |      |     | d16:1 | C25:0 | 5   |
| C42:4 | 3.67  | 0.17  | 298  | 14  |       |       |     |
|       |       |       |      |     | d18:2 | C24:2 | 84  |

|       |       |       |      |     |       |       |     |
|-------|-------|-------|------|-----|-------|-------|-----|
| C42:3 | 21.2  | 0.6   | 1720 | 49  | d18:1 | C24:3 | 16  |
|       |       |       |      |     | d18:2 | C24:1 | 66  |
|       |       |       |      |     | d18:1 | C24:2 | 32  |
| C42:2 | 33.0  | 0.8   | 2680 | 66  | d20:1 | C23:2 | 2   |
|       |       |       |      |     | d18:2 | C24:0 | 29  |
| C42:1 | 12.5  | 0.6   | 1020 | 53  | d18:1 | C24:1 | 71  |
| C43:3 | 0.509 | 0.012 | 42.1 | 1.0 | d18:1 | C24:0 | 100 |
|       |       |       |      |     | d18:2 | C25:1 | 60  |
| C43:2 | 1.73  | 0.07  | 143  | 6   | d16:1 | C27:2 | 40  |
|       |       |       |      |     | d18:2 | C25:0 | 6   |
|       |       |       |      |     | d18:1 | C25:1 | 28  |
|       |       |       |      |     | d17:1 | C26:1 | 37  |
|       |       |       |      |     | d19:1 | C24:1 | 17  |
| C43:1 | 1.30  | 0.05  | 108  | 4   | d20:1 | C23:1 | 11  |
|       |       |       |      |     | d18:1 | C25:0 | 25  |
|       |       |       |      |     | d19:1 | C24:0 | 10  |
|       |       |       |      |     | d19:0 | C24:1 | 50  |
| C44:3 | 0.468 | 0.007 | 39.3 | 0.6 | d20:1 | C23:0 | 15  |
|       |       |       |      |     | d18:1 | C26:2 | 20  |
|       |       |       |      |     | d18:0 | C26:3 | 30  |
|       |       |       |      |     | d17:1 | C27:2 | 30  |
| C44:2 | 0.276 | 0.011 | 23.2 | 0.9 | d20:1 | C28:2 | 20  |
|       |       |       |      |     | d18:1 | C26:1 | 36  |
|       |       |       |      |     | d18:0 | C26:2 | 36  |
| C44:1 | 0.216 | 0.005 | 18.2 | 0.4 | d19:1 | C25:1 | 28  |
|       |       |       |      |     | d18:0 | C26:1 | 21  |
|       |       |       |      |     | d17:0 | C27:1 | 19  |
|       |       |       |      |     | d16:0 | C28:1 | 18  |
|       |       |       |      |     | d19:0 | C25:1 | 22  |
|       |       |       |      |     | d20:0 | C24:1 | 19  |

<sup>1</sup> The sphingoid base nomenclature (e.g., d18:1 for sphingosine) gives the number of hydroxyl groups (d for two), followed by the chain length (number of carbons) and number of double bonds. Quantitation of these backbones assumes similar ion yields as for the corresponding d18 species.

<sup>2</sup> Determined during SM analysis by ion trap as outlined under Experimental Procedures.

**Supplemental Table 4B:** Monohexosylceramides in human plasma samples. All measurements were performed in quadruplicate.

| Sphingoid base <sup>1</sup> | Fatty acid | Mean (nmol/ml) | SEM (nmol/ml) | Mean (µg/dl) | SEM (µg/dl) | %Glc <sup>2</sup> | %Gal <sup>2</sup> |
|-----------------------------|------------|----------------|---------------|--------------|-------------|-------------------|-------------------|
| d16:1 <sup>3</sup>          | C22:0      | 0.036          | 0.010         | 2.79         | 0.76        | 96                | 4                 |
| d18:0                       | C13:0      | 0.0025         | 0.0016        | 0.16         | 0.11        |                   |                   |
| d18:0                       | C14:0      | 0.0010         | 0.0007        | 0.07         | 0.05        |                   |                   |
| d18:0                       | C16:0      | 0.0026         | 0.0009        | 0.18         | 0.06        | 100               | 0                 |
| d18:0                       | C17:0      | 0.0042         | 0.0023        | 0.30         | 0.16        |                   |                   |
| d18:0                       | C18:1      | 0.0003         | 0.0002        | 0.02         | 0.02        |                   |                   |
| d18:0                       | C18:0      | 0.0006         | 0.0003        | 0.04         | 0.02        |                   |                   |
| d18:0                       | C20:0      | 0.0134         | 0.0051        | 1.05         | 0.38        | 100               | 0                 |
| d18:0                       | C22:0      | 0.0072         | 0.0018        | 0.57         | 0.14        | 80                | 20                |
| d18:0                       | C24:1      | 0.0038         | 0.0012        | 0.31         | 0.10        |                   |                   |
| d18:0                       | C24:0      | 0.0078         | 0.0012        | 0.63         | 0.10        | 88                | 12                |
| d18:0                       | C26:1      | 0.0071         | 0.0019        | 0.60         | 0.16        | 34                | 66                |
| d18:0                       | C26:0      | 0.0090         | 0.0019        | 0.76         | 0.16        | 50                | 50                |
| d18:1                       | C14:0      | 0.0011         | 0.0009        | 0.07         | 0.06        |                   |                   |
| d18:1                       | C16:0      | 0.336          | 0.029         | 23.5         | 2.0         | 95                | 5                 |
| d18:1                       | C17:0      | 0.0081         | 0.0014        | 0.58         | 0.10        |                   |                   |
| d18:1                       | C18:1      | 0.0127         | 0.0027        | 0.92         | 0.19        |                   |                   |
| d18:1                       | C18:0      | 0.0275         | 0.0037        | 2.00         | 0.27        | 97                | 3                 |
| d18:1                       | C19:0      | 0.0016         | 0.0008        | 0.12         | 0.06        |                   |                   |
| d18:1                       | C20:0      | 0.079          | 0.008         | 5.98         | 0.61        | 96                | 4                 |
| d18:1                       | C22:0      | 0.522          | 0.033         | 41.0         | 2.6         | 98                | 2                 |
| d18:1                       | C23:0      | 0.187          | 0.017         | 15.0         | 1.3         | 92                | 8                 |
| d18:1                       | C24:1      | 0.332          | 0.009         | 27.0         | 0.7         | 96                | 4                 |
| d18:1                       | C24:0      | 0.409          | 0.028         | 33.2         | 2.3         | 99                | 1                 |
| d18:1                       | C25:0      | 0.0093         | 0.0027        | 0.77         | 0.22        |                   |                   |
| d18:1                       | C26:1      | 0.0178         | 0.0018        | 1.50         | 0.15        | 73                | 27                |
| d18:1                       | C26:0      | 0.0073         | 0.0016        | 0.62         | 0.13        | 100               | 0                 |
| d18:2 <sup>3</sup>          | C14:0      | 0.0024         | 0.0008        | 0.16         | 0.06        |                   |                   |
| d18:2                       | C15:0      | 0.0013         | 0.0008        | 0.09         | 0.05        |                   |                   |
| d18:2                       | C16:0      | 0.013          | 0.003         | 1.1          | 0.2         | 87                | 13                |
| d18:2                       | C18:1      | 0.0022         | 0.0007        | 0.16         | 0.05        |                   |                   |
| d18:2                       | C20:1      | 0.0085         | 0.0022        | 0.64         | 0.17        | 100               | 0                 |
| d18:2                       | C20:0      | 0.170          | 0.082         | 12.8         | 6.2         | 82                | 18                |
| d18:2                       | C21:0      | 0.0125         | 0.004         | 0.96         | 0.31        | 100               | 0                 |
| d18:2                       | C22:0      | 0.0577         | 0.0050        | 4.5          | 0.4         | 96                | 4                 |

<sup>1</sup> The sphingoid base nomenclature (e.g., d18:1 for sphingosine) gives the number of hydroxyl groups (d for two), followed by the chain length (number of carbons) and number of double bonds.

<sup>2</sup> GlcCer and GalCer were determined by an additional LC MS/MS analysis under the LC conditions that resolve these monohexosylceramides.

<sup>3</sup> Quantitation of these backbones assumes similar ion yields as for the corresponding d18 species.

**Supplemental Table 4C:** Ceramides in human plasma samples. All measurements were performed in quadruplicate.

| Sphingoid base <sup>1</sup> | Fatty acid | Mean (nmol/ml) | SEM (nmol/ml) | Mean (µg/dl) | SEM (µg/dl) |      |
|-----------------------------|------------|----------------|---------------|--------------|-------------|------|
| d16:1 <sup>2</sup>          | C22:0      | 0.094          | 0.003         | 5.59         | 0.20        |      |
|                             | C13:0      | 0.009          | 0.0003        | 0.44         | 0.02        |      |
| d18:0                       | C14:0      | 0.088          | 0.0004        | 4.49         | 0.02        |      |
|                             | C15:0      | 0.005          | 0.0004        | 0.28         | 0.02        |      |
|                             | C16:0      | 0.261          | 0.0004        | 14.1         | 0.0         |      |
|                             | C17:0      | 0.009          | 0.0004        | 0.52         | 0.02        |      |
|                             | C18:1      | 0.038          | 0.001         | 2.13         | 0.05        |      |
|                             | C18:0      | 0.146          | 0.002         | 8.31         | 0.10        |      |
|                             | C20:0      | 0.089          | 0.001         | 5.29         | 0.03        |      |
|                             | C22:0      | 0.685          | 0.003         | 42.8         | 0.2         |      |
|                             | C24:1      | 0.552          | 0.003         | 35.9         | 0.2         |      |
|                             | C24:0      | 1.22           | 0.004         | 79.6         | 0.3         |      |
|                             | C26:2      | 0.196          | 0.002         | 13.2         | 0.1         |      |
|                             | C26:1      | 0.031          | 0.001         | 2.08         | 0.05        |      |
|                             | C26:0      | 0.041          | 0.002         | 2.78         | 0.11        |      |
|                             | d18:1      | C14:0          | 0.012         | 0.001        | 0.60        | 0.06 |
|                             |            | C16:0          | 0.331         | 0.029        | 17.8        | 1.6  |
| C17:0                       |            | 0.008          | 0.001         | 0.45         | 0.05        |      |
| C18:1                       |            | 0.022          | 0.001         | 1.22         | 0.06        |      |
| C18:0                       |            | 0.128          | 0.012         | 7.23         | 0.70        |      |
| C19:0                       |            | 0.040          | 0.002         | 2.34         | 0.11        |      |
| C20:0                       |            | 0.145          | 0.007         | 8.62         | 0.44        |      |
| C22:0                       |            | 1.22           | 0.046         | 76.2         | 2.9         |      |
| C23:0                       |            | 0.281          | 0.033         | 17.9         | 2.1         |      |
| C24:1                       |            | 1.00           | 0.029         | 65.0         | 1.9         |      |
| C24:0                       |            | 3.00           | 0.107         | 195          | 7           |      |
| C25:0                       |            | 0.271          | 0.013         | 18.0         | 0.9         |      |
| C26:1                       |            | 0.036          | 0.002         | 2.41         | 0.12        |      |
| C26:0                       |            | 0.061          | 0.0007        | 4.15         | 0.05        |      |
| d18:2 <sup>2</sup>          |            | C14:0          | 0.005         | 0.001        | 0.23        | 0.03 |
|                             | C15:0      | 0.001          | 0.001         | 0.07         | 0.03        |      |
|                             | C16:0      | 0.048          | 0.004         | 2.60         | 0.20        |      |
|                             | C18:1      | 0.006          | 0.001         | 0.31         | 0.06        |      |
|                             | C20:1      | 0.006          | 0.003         | 0.35         | 0.17        |      |
|                             | C20:0      | 0.034          | 0.005         | 1.99         | 0.32        |      |
|                             | C21:0      | 0.004          | 0.001         | 0.27         | 0.07        |      |
|                             | C22:0      | 0.200          | 0.009         | 12.4         | 0.5         |      |
|                             | C23:1      | 1.08           | 0.109         | 67.8         | 6.8         |      |
|                             | C23:0      | 0.086          | 0.013         | 5.41         | 0.82        |      |
|                             | C24:2      | 0.096          | 0.007         | 6.20         | 0.47        |      |
|                             | C24:1      | 0.001          | 0.0001        | 0.01         | 0.01        |      |

<sup>1</sup> The sphingoid base nomenclature (e.g., d18:1 for sphingosine) gives the number of hydroxyl groups (d for two), followed by the chain length (number of carbons) and number of double bonds.

<sup>2</sup> Quantitation of these backbones assumes similar ion yields as for the corresponding d18 species.

**Supplemental Table 4D:** Sphingoid bases in human plasma samples. All measurements were performed in quadruplicate.

| <b>Sphingoid base<sup>1</sup></b>              | <b>Mean<br/>(pmol/ml)</b> | <b>SEM<br/>(pmol/ml)</b> | <b>Mean<br/>(µg/dl)</b> | <b>SEM<br/>(µg/dl)</b> |
|------------------------------------------------|---------------------------|--------------------------|-------------------------|------------------------|
| Sphinganine (d18:0)                            | 64                        | 8                        | 1.9                     | 0.2                    |
| Sphingosine (d18:1)                            | 91                        | 10                       | 2.7                     | 0.3                    |
| Sphinganine 1-phosphate (d18:0-P)              | 97                        | 15                       | 3.7                     | 0.6                    |
| Sphingosine 1-phosphate (d18:1-P)              | 308                       | 10                       | 11.7                    | 0.4                    |
| Sphingosine 1-phosphate (d16:1-P) <sup>2</sup> | 3.3                       | 1.2                      | 0.12                    | 0.04                   |
| Sphingosine 1-phosphate (d19:1-P) <sup>2</sup> | 4.5                       | 2.0                      | 0.17                    | 0.08                   |

<sup>1</sup> The sphingoid base nomenclature (e.g., d18:1 for sphingosine) gives the number of hydroxyl groups (d for two), followed by the chain length (number of carbons) and number of double bonds.

<sup>2</sup> Quantitation of these backbones assumes similar ion yields as for the corresponding d18 species (d17 subspecies were not quantified because this chain length was used for the spiked internal standard).



**Supplemental Table 5A.** Total (free and esterified) sterol levels in human plasma. All measurements were performed in triplicate.

| <b>Sterol<sup>1</sup></b>      | <b>Mean<br/>(nmol/ml)</b>     | <b>SEM<br/>(nmol/ml)</b>      | <b>Mean<br/>(<math>\mu</math>g/dl)</b> | <b>SEM<br/>(<math>\mu</math>g/dl)</b> |
|--------------------------------|-------------------------------|-------------------------------|----------------------------------------|---------------------------------------|
| 24S-hydroxycholesterol         | 0.049                         | 0.002                         | 1.97                                   | 0.08                                  |
| 25-hydroxycholesterol          | 0.020                         | 0.003                         | 0.81                                   | 0.12                                  |
| 27-hydroxycholesterol          | 0.538                         | 0.040                         | 21.6                                   | 1.6                                   |
| 4 $\beta$ -hydroxycholesterol  | 0.055                         | 0.002                         | 2.21                                   | 0.08                                  |
| 7-dehydrocholesterol           | 3.01                          | 0.254                         | 116                                    | 10                                    |
| 7-oxocholesterol               | 0.122                         | 0.083                         | 4.91                                   | 3.34                                  |
| 7 $\alpha$ -hydroxycholesterol | 0.335                         | 0.068                         | 13.5                                   | 2.7                                   |
| Campesterol <sup>2</sup>       | 6.46                          | 0.051                         | 259                                    | 2.0                                   |
| Cholestenone                   | 0.079                         | 0.022                         | 3.04                                   | 0.85                                  |
| Desmosterol <sup>2</sup>       | 1.81                          | 0.067                         | 69.6                                   | 2.6                                   |
| Lanosterol <sup>2</sup>        | 0.480                         | 0.114                         | 20.5                                   | 4.9                                   |
| Lathosterol <sup>2</sup>       | 5.38                          | 0.038                         | 208                                    | 1.0                                   |
| Sitosterol <sup>2</sup>        | 5.53                          | 0.021                         | 229                                    | 1.0                                   |
|                                | <b><math>\mu</math>mol/ml</b> | <b><math>\mu</math>mol/ml</b> | <b>mg/dl</b>                           | <b>mg/dl</b>                          |
| Cholesterol <sup>2</sup>       | 3.76                          | 0.098                         | 145                                    | 4.0                                   |

<sup>1</sup> In addition to the sterols shown, two known oxidation products of cholesterol, 5/6 $\alpha$ - and 5/6 $\beta$ -epoxycholesterol were detected. These sterols form spontaneously in variable amounts during sample work-up and are thus not reported here.

<sup>2</sup> Measured by gas chromatography-mass spectrometry; all other sterols measured by liquid chromatography-mass spectrometry.

**Supplemental Table 5B.** Free sterol levels in human plasma. All measurements were performed in triplicate.

| <b>Sterol<sup>1</sup></b> | <b>Mean<br/>(nmol/ml)</b> | <b>SEM<br/>(nmol/ml)</b> | <b>Mean<br/>(µg/dl)</b> | <b>SEM<br/>(µg/dl)</b> | <b>%<br/>Free</b> |
|---------------------------|---------------------------|--------------------------|-------------------------|------------------------|-------------------|
| 24S-hydroxycholesterol    | 0.006                     | 0.0003                   | 0.255                   | 0.012                  | 12.9              |
| 25-hydroxycholesterol     | 0.001                     | 0.0001                   | 0.036                   | 0.002                  | 4.4               |
| 27-hydroxycholesterol     | 0.013                     | 0.001                    | 0.514                   | 0.029                  | 2.4               |
| 4β-hydroxycholesterol     | 0.014                     | 0.0005                   | 0.546                   | 0.019                  | 24.7              |
| 7-dehydrocholesterol      | n.d.                      | n.d.                     | n.d.                    | n.d.                   | n.d.              |
| 7-oxocholesterol          | 0.014                     | 0.008                    | 0.551                   | 0.316                  | 11.2              |
| 7α-hydroxycholesterol     | 0.012                     | 0.002                    | 0.468                   | 0.063                  | 3.5               |
| Campesterol <sup>2</sup>  | 1.35                      | 0.014                    | 54.0                    | 0.577                  | 20.8              |
| Cholestenone              | n.d.                      | n.d.                     | n.d.                    | n.d.                   | n.d.              |
| Desmosterol <sup>2</sup>  | 0.790                     | 0.017                    | 30.3                    | 0.667                  | 43.6              |
| Lanosterol <sup>2</sup>   | n.d.                      | n.d.                     | n.d.                    | n.d.                   | n.d.              |
| Lathosterol <sup>2</sup>  | 2.43                      | 0.048                    | 93.7                    | 1.86                   | 45.0              |
| Sitosterol <sup>2</sup>   | 0.902                     | 0.089                    | 37.3                    | 3.67                   | 16.3              |
|                           | <b>µmol/ml</b>            | <b>µmol/ml</b>           | <b>mg/dl</b>            | <b>mg/dl</b>           |                   |
| Cholesterol <sup>2</sup>  | 0.820                     | 0.009                    | 31.6                    | 0.300                  | 21.8              |

<sup>1</sup> In addition to the sterols shown, two known oxidation products of cholesterol, 5/6α- and 5/6β-epoxycholesterol were detected. These sterols form spontaneously during sample work-up and are thus not reported here.

<sup>2</sup> Measured by gas chromatography-mass spectrometry; all other sterols measured by liquid chromatography-mass spectrometry.

n.d., Not detected.

**Supplemental Table 5C:** Cholesteryl ester molecular species in human plasma. All measurements were performed in triplicate.

| <b>Cholesteryl ester<sup>1</sup></b> | <b>Mean<br/>(nmol/ml)</b> | <b>SEM<br/>(nmol/ml)</b> | <b>Mean<br/>(mg/dl)</b> | <b>SEM<br/>(mg/dl)</b> |
|--------------------------------------|---------------------------|--------------------------|-------------------------|------------------------|
| CE(14:0)                             | 80                        | 2                        | 4.77                    | 0.12                   |
| CE(14:1)                             | 30                        | 1                        | 1.78                    | 0.06                   |
| CE(15:0)                             | 30                        | 1                        | 1.83                    | 0.06                   |
| CE(15:1)                             | 30                        | 1                        | 1.83                    | 0.06                   |
| CE(16:0)                             | 190                       | 6                        | 11.9                    | 0.4                    |
| CE(16:1)                             | 111                       | 4                        | 6.91                    | 0.25                   |
| CE(16:2)                             | 31                        | 1                        | 1.92                    | 0.06                   |
| CE(17:0)                             | 32                        | 1                        | 2.04                    | 0.06                   |
| CE(17:1)                             | 31                        | 1                        | 1.97                    | 0.06                   |
| CE(18:0)                             | 59                        | 3                        | 3.85                    | 0.20                   |
| CE(18:1)                             | 533                       | 13                       | 34.7                    | 0.8                    |
| CE(18:2)                             | 1820                      | 85                       | 118                     | 6                      |
| CE(18:3)                             | 147                       | 8                        | 9.50                    | 0.52                   |
| CE(20:0)                             | 32                        | 1                        | 2.18                    | 0.07                   |
| CE(20:1)                             | 30                        | 1                        | 2.04                    | 0.07                   |
| CE(20:2)                             | 34                        | 2                        | 2.30                    | 0.14                   |
| CE(20:3)                             | 32                        | 1                        | 2.16                    | 0.07                   |
| CE(20:4)                             | 237                       | 13                       | 15.9                    | 0.9                    |
| CE(22:0)                             | 23                        | 2                        | 1.63                    | 0.14                   |
| CE(22:1)                             | 10                        | 1                        | 0.71                    | 0.07                   |
| CE(22:2)                             | 10                        | 1                        | 0.71                    | 0.07                   |
| CE(22:6)                             | 32                        | 2                        | 2.23                    | 0.14                   |

<sup>1</sup> CE(total acyl carbons:total double bonds).

**Supplemental Table 6A:** Concentration and composition of free dolichol in human plasma<sup>1</sup>. All measurements were performed in triplicate.

| <b>Dolichol</b> | <b>Mean<br/>(pmol/ml)</b> | <b>SEM<br/>(pmol/ml)</b> | <b>Mean<br/>(ng/dl)</b> | <b>SEM<br/>(ng/dl)</b> |
|-----------------|---------------------------|--------------------------|-------------------------|------------------------|
| 16              | 0.13                      | 0.05                     | 14.4                    | 5.5                    |
| 17              | 1.30                      | 0.12                     | 153                     | 14                     |
| 18              | 8.79                      | 0.54                     | 1094                    | 67                     |
| 19              | 13.2                      | 1.3                      | 1733                    | 171                    |
| 20              | 1.7                       | 0.58                     | 235                     | 80                     |
| 21              | n.d.                      | n.d.                     | n.d.                    | n.d.                   |

<sup>1</sup> Free alcohol forms of dolichols 16-20 were analyzed as outlined under Experimental Procedures. Nor-dolichols 16-21 were used as internal standards for quantitation.

n.d., Not detected.

**Supplemental Table 6B:** Concentration and composition of CoQ in human plasma<sup>1</sup>. All measurements were performed in triplicate.

| <b>Coenzyme-Q</b> | <b>Mean<br/>(nmol/ml)</b> | <b>SEM<br/>(nmol/ml)</b> | <b>Mean<br/>(µg/dl)</b> | <b>SEM<br/>(µg/dl)</b> |
|-------------------|---------------------------|--------------------------|-------------------------|------------------------|
| 9                 | 0.29                      | 0.04                     | 23.1                    | 3.2                    |
| 10                | 4.31                      | 0.42                     | 371                     | 35                     |

<sup>1</sup> CoQ<sub>9</sub> and CoQ<sub>10</sub> were detected as outlined under Experimental Procedures. Yeast CoQ<sub>6</sub> was used as an internal standard for quantitation.

## EXPERIMENTAL PROCEDURES

### Production of the standard plasma reference material

The plasma standard reference material was produced by NIH in collaboration with NIST. A total of 22 liter of plasma was obtained from 100 individuals between 40 and 50 years of age who have undergone overnight fasting prior to the blood draw. The blood was collected into cold lithium heparin used as an anticoagulant and immediately centrifuged at 4°C at 8000 x g. To minimize losses of metabolites, the samples were processed to -80°C within 30 min of collection and stored under nitrogen. A rapid glucose test was administered to exclude individuals who did not adhere to the fasting requirement. Plasma was derived from an equal number of men and woman in an age range between 40 to 50 years with a racial distribution that reflects the distribution in the US population. Individuals with overt conditions, diseases and disorders, with body-mass indices outside the 95<sup>th</sup> percentile and anyone adhering to extreme dietary or exercise regimen were disqualified. The plasma was thawed once, pooled and thoroughly blended at 4°C, aliquoted into 1 ml vials, processed to -80°C under nitrogen and distributed for analysis. Red blood cell contamination was minimized and heme-contaminated individual samples were not used to pool. All plasma was demonstrated to be non-reactive when tested by US Food and Drug Administration licensed procedures for hepatitis B surface antigen, hepatitis C virus and human immunodeficiency virus.

### Analytical procedures

Fatty acyls – Free fatty acids were extracted and analyzed by gas chromatography mass spectrometry (GC/MS) essentially as described previously (1). Briefly, 200 µl of plasma was supplemented with deuterated internal standards (Cayman Chemical, Ann Arbor, MI) and extracted twice with 0.05 N methanolic HCl/isooctane (1:3, v/v) and the combined isooctane layers were evaporated to dryness. The extracted free fatty acids were dissolved in 1% diisopropylethylamine in acetonitril and derivatized with 1% pentafluorobenzyl bromide. The fatty acid esters were analyzed by GC/MS on an Agilent 6890N gas chromatograph equipped with an Agilent 5973 mass selective detector (Agilent, Santa Clara, CA). Fatty acid quantitation was achieved by the stable isotope dilution method (2).

Eicosanoids were isolated from 0.9 ml of plasma supplemented with deuterated internal standards (Cayman Chemical) by solid phase extraction and analyzed by liquid chromatography mass spectrometry (LC/MS) as described (3). The extracted samples were evaporated, reconstituted in a small volume and the eicosanoids were separated by reverse phase liquid chromatography (LC) on a Synergy C18 column (2.1 x 250 mm, 4 microns; Phenomenex, Torrance, CA). Eicosanoids were analyzed using a tandem quadrupole mass spectrometer (MDS SCIEX 4000 Q Trap; Applied Biosystems, Foster City, CA) via multiple-reaction monitoring (MRM) in negative-ionization mode. Quantitative eicosanoid determination was performed by the stable isotope dilution method (2). Data analysis was performed using MultiQuant 1.2 software (Applied Biosystems).

Glycerolipid and cholesteryl esters – Neutral lipids were extracted from plasma (1 µl diluted to 5ml with saline containing internal standards for each lipid class) using the immiscible solvent system isooctane/ethyl acetate as previously described (4). The triglycerides and cholesteryl esters were separated by a single normal phase HPLC column on-line to a tandem quadrupole mass spectrometer (MDS Sciex 4000 Q TRAP) and analyzed in a combined multiple reaction monitoring (cholesteryl esters) and mass spectral ( $[M+NH_4]^+$  detection mode, triglyceride and diglycerides) as described (4). The 24 cholesteryl esters were quantified using a single internal standard and the calibration curve generated using 14 separate reference standard cholesteryl esters. The elution of the triglycerides was monitored after programmed change in instrument operation to the MS-only

mode occurred and the abundance of each triglyceride isobaric molecular species as  $[M+NH_4]^+$  was used to calculate concentration by forming ratios between each abundance and the abundance of a single internal standard and applying a linear standard curve equation generated as the average from 4 separate reference triglycerides. A separate aliquot of the plasma (5  $\mu$ l diluted with 75  $\mu$ l of saline and containing the 1,3-diglyceride internal standard) was derivatized using difluorophenylisocyanate (DFPI) to form the difluorophenylurethane of each diglyceride lipid species. The isomeric 1,2- and 1,3-diglyceride derivatives could be separated on the normal phase HPLC column and the abundance of each isobaric molecular species detected as the  $[M+NH_4]^+$  molecular adduct ion. Concentration of each diglyceride molecular species was calculated from a standard curve generated from a 1,3-diglyceride reference standard and a separate curve for the 1,2-diglyceride reference standard.

Glycerophospholipids – Samples were extracted and analyzed essentially as described with a slight modification (5). Briefly, equal volumes of ice cold 0.1 N methanolic HCl and ice cold  $CHCl_3$  were added to the NIST plasma aliquots. Following 1 min vortex at 4°C layers were separated by centrifugation (18,000g for 5 min, 4°C). After the extraction and standards addition solvent was evaporated. The resulting lipid film was dissolved in 100  $\mu$ l of isopropanol (IPA):hexane:100 mM  $NH_4COOH(aq)=58:40:2$  (mobile phase A). NIST human plasma glycerophospholipids were separated by normal phase LC on a Luna Silica column (Phenomenex) using a binary gradient program consisting of mobile phase A and IPA:hexane:100mM  $NH_4COOH(aq)=50:40:10$  (mobile phase B), identified by MS/MS analysis (6) (MDS SCIEX 4000 Q Trap), and quantified by subsequent LC/MS analysis as described (5). Quantitative analysis of glycerophospholipid composition was performed in two stages, as many of the abundant lipids exceeded the maxima of the established standard curves. In the first stage of analysis, PA, PG, PS, LPC, and LPE lipids were quantified from four technical replicates. In the second stage of analysis, samples were diluted by 10 fold from the above protocol, and quantified for PC, PE, and PI lipids from five technical replicates. Each replicate above was prepared using 0.1 ml of human plasma SRM.

For N-acyl-PS analysis, an acidic Folch two-phase solution (7) of 8:4:3 chloroform:methanol:aqueous (v/v) was prepared with the aqueous portion composed of 0.33 ml human plasma SRM sample and 1.17 ml of 1.2 N HCl. Synthetic 1,2-dioleoyl-sn-glycero-3-phospho-L-serine-N-nonadecanoyl (Avanti Polar Lipids) was added as internal standard. The extracted N-acyl-PS was analyzed by normal-phase LC coupled with MRM, as described (8). Data acquisition and analysis were performed using Analyst 1.4 software (Applied Biosystems).

Sphingolipids – The sphingolipids were extracted from 10  $\mu$ l of the NIST plasma and prepared for LC ESI-MS/MS as described previously (9), except a larger volume (0.6 ml) of LC mobile phase solvent was needed to redissolve the final dried residue. For this purpose, 0.3 ml of the LC mobile phase solvent was added to the residue in the extraction test tube, which was sonicated for approximately 15 s, then the suspension was transferred to a microcentrifuge tube. Next, the test tube was rinsed with an additional 0.3 ml of the mobile phase solvent, sonicated, and this was also added to the microcentrifuge tube; and finally, the pooled sample was centrifuged at 14,000 to 16,000 x g for several min and the clear supernatant was transferred to the autoinjector vial for analysis.

The LC conditions were the same as described previously (9), with the following minor modifications for the normal phase chromatography for complex sphingolipids (Cer, SM and monohexosylCer). These lipids were separated using a Supelco 2.1 (i.d.) x 50 mm LC-NH2 column at a flow rate of 0.75 ml/min and a binary solvent system. Prior to injection, the column was equilibrated for 1.0 min with 98% Mobile phase A2 ( $CH_3CN/CH_3OH/CH_3COOH$ , 97/2/1, v/v/v, with 5 mM ammonium acetate) and 2% Mobile phase B2 ( $CH_3OH/H_2O/CH_3(CH_2)_3OH/CH_3COOH$ , 64/15/20/1 v/v/v/v with 5 mM ammonium acetate) and, after sample injection, this mixture was continued for 3.2

min, followed by a 0.4-min linear gradient to 82% Mobile phase A2, which was held for 0.8 min. This was followed by a 1.6-min linear gradient to 100% B2 followed by a 1.0-min linear gradient to starting conditions. The temperature of the ion source was set to 350°C for optimal ionization at this flow rate.

The sphingolipids were analyzed by LC ESI-MS/MS in positive ionization mode using an ABI 3000 triple quadrupole (QQQ) tandem mass spectrometer for complex sphingolipids (Cer, SM and monohexosylCer), and the sphingoid bases and sphingoid base 1-phosphates were analyzed using an MDS SCIEX 4000 Q Trap. Quantitation was performed by MRM and comparison with the spiked internal standard (9) as well as correction for differences in ion yield due to chain length, i.e., standard curves were prepared using Cer, SM and GlcCer with N-acyl-chain lengths from C12 to C24, and the other chain lengths were estimated by interpolation.

Since the monohexosylCer are comprised of both GlcCer and GalCer, the proportions of these were determined by analysis of the samples using a silica column (Supelco 2.1 (i.d.) x 250 mm LC-Si) eluted isocratically with Mobile phase A3 (CH<sub>3</sub>CN/CH<sub>3</sub>OH/CH<sub>3</sub>COOH, 97/2/1, v/v/v, with 5 mM ammonium acetate) at 0.75 ml per min (run length, 10.5 min), as described previously (9), except that the temperature of the ion source was set to 350°C. For the data shown in the tables, each chain length of monohexosylCer was quantified by LC ESI-MS/MS using the LC-NH<sub>2</sub> column and the % that is comprised of GlcCer versus GalCer was determined using chromatography on this silica column.

Likewise, rigorous identification of the lipid backbones of the SM required additional analysis because in positive ionization mode, the product ion from SM arises from loss of the phosphocholine head group, which does not provide information about the specific sphingoid base(s) and fatty acid(s). To determine this information, the SM fraction was collected under the LC conditions described above, then the backbone subspecies were analyzed using the MDS SCIEX 4000 Q Trap in negative ionization mode, which produces cleavage products with backbone information (9). This is done by selecting the same precursor ion m/z for the first and second quadrupoles with Q2 offset by only 5 to 10 eV so fragmentation does not occur in the collision cell, then each precursor is induced to fragment in the ion trap by application of an amplitude frequency. This trap-induced fragmentation protocol enhances backbone structure specific fragments for the sphingoid base and fatty acids, allowing identification of the isomers that comprise each precursor m/z (for example, d16:1;C18:0 versus d18:1;C16:0). In our experience, the ions from the different subspecies are proportional to their amounts within a related series. Thus, the amounts of each SM subspecies were determined by first quantifying each isobaric mixture by LC ESI-MS/MS in positive ionization mode, then the ratios of the product ions from the trap-induced fragmentation in negative ionization mode were used to estimate their relative proportions. A signal to background ratio of 3 was used as a cut-off for quantitation, and any ions that were not positively identified by both methods were not included in the data set.

Sterols – Sterols were analyzed as described previously with minor modifications (10-12). Total sterols (free sterols plus steryl esters) were extracted using two procedures dependent on the type of chromatography and mass spectrometry used for subsequent separation and detection. Sterols to be analyzed by HPLC-MS were extracted from the NIST plasma sample using a modified Bligh/Dyer extraction after addition of deuterated surrogate standards (Avanti Polar Lipids, Alabaster, AL). Extracts were dried under nitrogen and subjected to hydrolysis at high temperature (70°C) for 1 hr with methanolic KOH. Samples were again subjected to modified Bligh/Dyer extraction, dried under nitrogen, and sterols isolated by solid-phase extraction on 100mg Isolute silica cartridges (Biotage, Charlotte, NC). Eluted samples were dried under nitrogen and reconstituted in 90% methanol. For sterols analyzed by GC-MS, aliquots of NIST plasma and surrogate standards were placed directly in methanolic KOH and hydrolyzed at 80-90°C for 2 hrs. Samples were extracted with petroleum ether and dried under nitrogen. Alcoholic groups on sterols were derivatized with trimethylsilyl ethers by

treatment with Tri-Sil reagent (Pierce, Rockford, IL). Free sterols were extracted as above, but without base hydrolysis.

Oxysterols and several less abundant sterols were resolved by HPLC on a Luna C18 column (250x2mm, 3 $\mu$ m particle size; Phenomenex) using a binary gradient of 85% MeOH (A) and 100% MeOH (B), both supplemented with 5 mM ammonium acetate. Sterols were measured by tandem mass spectrometry using a triple quadrupole mass spectrometer (MDS Sciex 4000 Q TRAP) equipped with an electrospray interface. The source was operated in the positive mode, which predominantly formed ammonium adducts with sterols. The MS was operated in the multiple reaction monitoring mode (MRM) for maximum sensitivity. Abundant sterols were separated with an Agilent 6890 gas chromatograph equipped with a DB-5MS column (30m, 0.25mm i.d., 250 $\mu$ m film thickness). Sterols were measured with a 5973 MSD with electron ionization (Agilent, Santa Clara, CA).

Cardiolipin, Dolichol and ubiquinone analysis – For the analysis, neutral Folch extracts (7) were prepared from human plasma SRM samples to give a Folch two-phase solution of 8:4:3 chloroform:methanol:aqueous (v/v), with the aqueous portion composed of 0.33 ml of human plasma SRM sample and 1.17 ml phosphate-buffered saline. An internal standard mix composed of cardiolipin internal standard mixture 1 (Avanti Polar Lipids), nor-dolichol-[13-22] (Avanti Polar Lipids), and 0.05 mg/ml yeast coenzyme Q6 (Sigma) in chloroform was added for quantitation and the lipid extract contained in the organic phase was further processed for analysis.

Cardiolipin analysis was performed with normal-phase liquid chromatography coupled with tandem mass-spectrometry as described previously (13). Data acquisition and analysis were performed using Analyst QS software (Applied Biosystems). Dolichol and ubiquinone analyses were performed with reverse-phase chromatography coupled with MRM, as described (8). For dolichol analysis, samples were run in the negative ion mode and were monitored for singly-charged dolichol-acetate adduct ions  $[M+CH_3CO_2]^-$  paired with the loss of the acetate ion (59.000 amu) for each analyte and nor-dolichol standard. For coenzyme Q analysis, samples were run in the positive ion mode and were monitored for singly-charged coenzyme Q-ammonium adduct ions  $[M+NH_4]^+$  paired with the major fragment ion corresponding to a proton adduct of the quinone ring of coenzyme Q (197.000 amu) for each analyte and the internal standard. Data acquisition and analysis were performed using Analyst 1.4 software (Applied Biosystems).

Statistical Analyses – All experimental data are representative of at least three individual measurements. Data are expressed as mean  $\pm$  standard error of the mean (SEM).



## REFERENCES

1. Quehenberger, O., A. Armando, D. Dumlao, D. L. Stephens, and E. A. Dennis. 2008. Lipidomics analysis of essential fatty acids in macrophages. *Prostaglandins Leukot. Essent. Fatty Acids*. **79**: 123-129. Epub 2008 Nov 2008.
2. Hall, L. M., and R. C. Murphy. 1998. Electrospray mass spectrometric analysis of 5-hydroperoxy and 5-hydroxyeicosatetraenoic acids generated by lipid peroxidation of red blood cell ghost phospholipids. *J. Am. Soc. Mass. Spectrom.* **9**: 527-532.
3. Deems, R., M. W. Buczynski, R. Bowers-Gentry, R. Harkewicz, and E. A. Dennis. 2007. Detection and quantitation of eicosanoids via high performance liquid chromatography-electrospray ionization-mass spectrometry. *Methods Enzymol.* **432**: 59-82.
4. Hutchins, P. M., R. M. Barkley, and R. C. Murphy. 2008. Separation of cellular nonpolar neutral lipids by normal-phase chromatography and analysis by electrospray ionization mass spectrometry. *J. Lipid Res.* **49**: 804-813.
5. Ivanova, P. T., S. B. Milne, M. O. Byrne, Y. Xiang, and H. A. Brown. 2007. Glycerophospholipid identification and quantitation by electrospray ionization mass spectrometry. *Methods Enzymol.* **432**: 21-57.
6. Milne, S., P. Ivanova, J. Forrester, and H. Alex Brown. 2006. Lipidomics: an analysis of cellular lipids by ESI-MS. *Methods*. **39**: 92-103.
7. Folch, J., M. Lees, and G. H. Sloane Stanley. 1957. A simple method for the isolation and purification of total lipides from animal tissues. *J. Biol. Chem.* **226**: 497-509.
8. Guan, Z., S. Li, D. C. Smith, W. A. Shaw, and C. R. Raetz. 2007. Identification of N-acylphosphatidylserine molecules in eukaryotic cells. *Biochemistry*. **46**: 14500-14513.
9. Shaner, R. L., J. C. Allegood, H. Park, E. Wang, S. Kelly, C. A. Haynes, M. C. Sullards, and A. H. Merrill, Jr. 2009. Quantitative analysis of sphingolipids for lipidomics using triple quadrupole and quadrupole linear ion trap mass spectrometers. *J. Lipid Res.* **50**: 1692-1707.
10. McDonald, J. G., B. M. Thompson, E. C. McCrum, and D. W. Russell. 2007. Extraction and analysis of sterols in biological matrices by high performance liquid chromatography electrospray ionization mass spectrometry. *Methods Enzymol.* **432**: 145-170.
11. Dzeletovic, S., O. Breuer, E. Lund, and U. Diczfalusy. 1995. Determination of cholesterol oxidation products in human plasma by isotope dilution-mass spectrometry. *Anal. Biochem.* **225**: 73-80.
12. Xu, F., S. D. Rychnovsky, J. D. Belani, H. H. Hobbs, J. C. Cohen, and R. B. Rawson. 2005. Dual roles for cholesterol in mammalian cells. *Proc. Natl. Acad. Sci. USA*. **102**: 14551-14556.
13. Garrett, T. A., C. R. Raetz, T. Richardson, R. Kordestani, J. D. Son, and R. L. Rose. 2009. Identification of phosphatidylserylglutamate: a novel minor lipid in *Escherichia coli*. *J. Lipid Res.* **50**: 1589-1599.
